1 **Metatranscriptome analysis of the vaginal microbiota reveals potential**  
2 **mechanisms for recurrence and protection against metronidazole in**  
3 **bacterial vaginosis**

4 Zhi-Luo Deng<sup>\*1+</sup> (Zhiluo.Deng@helmholtz-hzi.de),

5 Cornelia Gottschick<sup>1,4+</sup> (cornelia.gottschick@uk-halle.de),

6 Sabin Bhuj<sup>2</sup> (sabinbhuj@gmail.com),

7 Clarissa Masur<sup>3</sup> (clarissa.masur@drwolffgroup.com),

8 Christoph Abels<sup>3</sup> (christoph.abels@drwolffgroup.com),

9 and Irene Wagner-Döbler<sup>1</sup> (Irene.Wagner-Doebler@helmholtz-hzi.de)

10

11 <sup>1</sup> Research Group Microbial Communication, Department of Medical Microbiology, Helmholtz Centre  
12 for Infection Research, Inhoffenstr. 7, 38124 Braunschweig, Germany

13 <sup>2</sup> Genome Analytics, Helmholtz Centre for Infection Research, Inhoffenstr. 7, 38124 Braunschweig,  
14 Germany

15 <sup>3</sup> Dr. August Wolff GmbH & Co. KG Arzneimittel, Sudbrackstrasse 56, 33611, Bielefeld, Germany

16 <sup>4</sup> Current address: Institute for Medical Epidemiology, Biometrics and Computer Science, Martin-  
17 Luther-University Halle-Wittenberg, Halle (Saale), Germany

18 + shared first authorship

19 \*Corresponding author

## 20 **Abstract**

21 **Background.** Bacterial vaginosis (BV) is a prevalent multifactorial disease of women in their  
22 reproductive years characterized by a shift from the healthy *Lactobacillus sp.* dominated  
23 microbial community towards a highly diverse anaerobic community. BV can initially be  
24 cured by antibiotic therapy in most women, but the high recurrence frequency represents a  
25 serious challenge. Moreover, for unknown reasons, a small number of women does not  
26 respond to therapy. In a clinical study, out of 37 women diagnosed with BV, 31 were  
27 successfully treated with a single peroral dose of metronidazole, while 6 still had BV after  
28 treatment. Here, we performed a metatranscriptome analysis of the vaginal microbiota of the  
29 subgroup of those non-responding patients (N = 6), comparing them to patients (N = 8) who  
30 were successfully treated. Moreover, we followed the changes in the metatranscriptome  
31 composition over three months (5 time-points) in patients (N = 2) that developed recurrence  
32 in comparison to patients (N = 2) that were permanently cured.

33 **Results.** In health, *Lactobacillus iners* and *L. crispatus* contributed more than 90% of all  
34 bacterial transcripts, but they did not co-occur. Their functional profiles *in vivo* confirmed the  
35 pathogenic role of *L. iners*. In BV, *Gardnerella vaginalis* contributed on average 37% of all  
36 transcripts. In some patients, transcripts from *Gardnerella* species isolated from the bladder  
37 were abundant. In non-responding patients, *cas* and DNA methyltransferase genes of *G.*  
38 *vaginalis* were highly up-regulated, suggesting that they might play a role in defense against  
39 DNA damaging agents like metronidazole.

40 **Conclusions.** We hypothesize that colonization by *L. iners* and re-infection through the  
41 bladder contribute to recurrence of BV. Our data suggest that Cas genes of *G. vaginalis*, in  
42 addition to protecting against phages, might be involved in DNA repair thus mitigating the  
43 bactericidal effect of DNA damaging agents like metronidazole.

44 Trial registration: ClinicalTrials.gov NCT02687789. Retrospectively registered on 12 October  
45 2015.

46

47 **Keywords**

48 Vaginal microbiome, bacterial vaginosis, antibiotic treatment, resistance, recurrence,

49 metatranscriptome, CRISPR-Cas, DNA repair

## 50 **Background**

51 The healthy vaginal microbiome (VMB) is characterized by low pH and low diversity and can  
52 be categorized into community state types (CSTs) that are dominated by different  
53 *Lactobacillus sp.* such as *L. crispatus*, *L. iners*, *L. gasseri* and less frequently *L. jensenii* or a  
54 more diverse community [1]. Bacterial vaginosis (BV) is a frequent multifactorial disease of  
55 women in their reproductive years that is characterized by a shift of this *Lactobacillus sp.*  
56 dominated bacterial community to a community of various mostly anaerobic bacteria [2]. BV  
57 is associated with a higher risk of acquiring sexually transmitted infections such as HIV,  
58 miscarriage and preterm birth [3]. The most common bacteria found in BV, identified by 16S  
59 rRNA gene sequencing, are *Gardnerella*, *Atopobium*, *Prevotella*, *Bacteroides*,  
60 *Peptostreptococcus*, *Mobiluncus*, *Sneathia*, *Leptotrichia*, *Mycoplasma* and BV associated  
61 bacterium 1 (BVAB1) to BVAB3 of the order Clostridiales. Recently, three CSTs dominated  
62 by *Gardnerella vaginalis*, Lachnospiraceae and *Sneathia sanguinegens*, respectively, have  
63 been described [4] and our recent study identified *S. amnii* as the best biomarker for BV [5].  
64 Metronidazole is a widely applied chemotherapeutic agent used to treat infectious diseases  
65 caused by anaerobic bacteria, and it is the first-line antibiotic for treating BV [6,7]. It is a  
66 prodrug which requires enzymatic reduction within the cell to transform it into an active form  
67 [8]. Metronidazole acts by damaging DNA, and resistance mechanisms have been studied in  
68 various pathogens [8]. Previous studies have shown that failure of BV treatment by  
69 metronidazole is relatively rare [5,9], and it is unclear if it is caused by resistance of the BV  
70 pathogens to metronidazole, and which mechanisms are acting *in vivo*. A recent study has  
71 demonstrated that failure of treatment of BV with metronidazole is not associated with higher  
72 loads of *G. vaginalis* and *A. vaginae* [10]. Therefore, the lack of response may result from the  
73 activity of the community instead of the abundance of the pathogens and their taxonomic

74 composition. The high rate of recurrence is another crucial problem for BV treatment. It has  
75 been reported that the one-year recurrence rate of BV ranges from 40% to 80% after treatment  
76 with metronidazole [11]. The recurrent rate is similar for other therapies such as clindamycin  
77 cream [12]. It has been hypothesized that patches of surviving bacterial biofilm may be one of  
78 the reasons for recurrence [11]. The predominant species of this multi-species biofilm is *G.*  
79 *vaginalis* [13]. *G. vaginalis* is frequently found in biofilms during BV but it is also a member  
80 of the healthy VMB [14]. *L. iners* is characteristic for a community state type in health but  
81 may be disadvantageous when the community shifts to a dysbiotic state [14-16]. Until now,  
82 the majority of studies regarding the VMB have focused on 16S rRNA gene sequencing,  
83 answering only questions on the taxonomic composition of bacterial communities but not on  
84 their functions [2]. A metatranscriptome analysis comparing vaginal swabs from two women  
85 with BV with two healthy subjects showed that *L. iners* upregulates transcription of the  
86 cholesterol-dependent cytolysin (CDC) and of genes belonging to the CRISPR system in BV  
87 [16]. No study has investigated the functional shifts of the VMB during antibiotic treatment of  
88 BV.

89 We had previously analyzed the VMB in the context of a clinical trial using 16S rRNA gene  
90 sequencing [5]. Of 37 patients diagnosed with BV and included in this study, 31 were cured  
91 by a single oral dose of metronidazole. Six patients did not respond, i.e. they were diagnosed  
92 with BV according to Nugent score at visit 2. Moreover, some patients developed recurrent  
93 BV during the three months of the study. Since we did not find differences in the taxonomic  
94 composition of the microbiota of non-responding and recurrent patients, we hypothesized that  
95 shifts in microbiota activity might be responsible for those different responses. We therefore  
96 chose the non-responding patients (N = 6) from the clinical study and compared their  
97 metatranscriptomes to those of 8 patients that were initially cured. For the analysis of

98 recurrence, we chose two recurrent patients from the lactic acid arm of the study (see below)  
99 and compared their metatranscriptomes to those of two permanently cured patients that were  
100 also provided with lactic acid pessaries, and followed their transcriptomes over the three  
101 months of the study (5 time-points). Our analysis is thus comprised of 14 patients, of which  
102 six were cured, six did not respond to treatment, and two developed recurrence. Including the  
103 time series samples, we analyzed 40 samples in total. We extracted the RNA and performed  
104 an in depth analysis of the metatranscriptomes of the VMB.

105 We could identify genes potentially leading to lack of response to metronidazole treatment  
106 and suggest a novel mechanism of *G. vaginalis* to mitigate the DNA damaging effect of  
107 metranidazole. Moreover, we demonstrate the importance of *G. vaginalis* for BV, which can  
108 be massively underestimated using 16S rRNA gene sequencing, shed light on the beneficial  
109 role of *L. crispatus* in comparison to *L. iners*, and hypothesize that recolonization of the  
110 vagina by *Gardnerella* strains residing in the bladder may contribute to recurrence. All of  
111 these findings are strongly supported by the metatranscriptome analyses reported here and  
112 should be validated in larger patient cohorts.

113

## 114 **Material and Methods**

### 115 **Study design**

116 Vaginal fluid samples of women analyzed here were a subset of the samples obtained during a  
117 randomized controlled clinical trial described previously [5]. The trial protocol was approved  
118 by the local ethics committee (Ärzttekammer Nordrhein - Medical Association North Rhine)  
119 and written consent was obtained from all participants. The clinical trial was conducted in  
120 accordance with the Declaration of Helsinki on Ethical Principles for Medical Research

121 Involving Human Subjects. Principles and guidelines for good clinical practice were followed.  
122 The study was registered on ClinicalTrials.gov with the identifier NCT02687789. Briefly,  
123 women were included into the clinical trial if they were BV positive according to Amsel  
124 criteria and Nugent score and were biofilm positive on vaginal epithelial cells and positive for  
125 extracellular polysaccharides (EPS) in urine. For treatment of acute BV, they received 2 g of  
126 metronidazole orally and were afterwards treated with an intravaginal pessary for three weeks,  
127 twice a week. Samples were taken during acute BV (visit 1), after receiving metronidazole 7  
128 to 28 days after visit 1 (visit 2), after pessary application one week after visit 2 (visit 3), after  
129 continued pessary application two weeks after visit 3 (visit 4) and during follow up three  
130 months after visit 4 (visit 5).

131 The aim of the clinical trial had been to compare the effectiveness of two different types of  
132 pessary. The results and the taxonomic composition of the vaginal microbial communities  
133 have been reported [5]. For the metatranscriptome analysis reported here, we chose a subset  
134 of 14 patients from the clinical trial. These 14 patients consisted of two groups named “with  
135 response to treatment” (N = 8) and “no response to treatment” (N = 6) (Fig. 1). Among the  
136 eight patients which responded to treatment, six were permanently cured and two experienced  
137 recurrence during the three months follow-up. For the analysis of recurrence, samples from all  
138 5 visits were analyzed for 4 patients (two cured and two with recurrence) (20 samples in  
139 total). These four patients all received the commercially available lactic acid pessary after  
140 metronidazole therapy at visit 3 and 4. For the analysis of lack of response to metronidazole,  
141 samples from all 14 patients were analyzed at two time points, acute BV (visit 1) and 7 to 28  
142 days after antibiotic treatment (visit 2) (28 samples in total). Nugent score > 6 was used to  
143 determine BV status, since it is considered the gold standard for BV diagnosis [17] (Table S1  
144 sheet 1). The BV status at visit 5 was determined by Amsel criteria since there was no Nugent

145 score available at that time point. The sample ID was obtained by concatenating the patient ID  
146 and letters “a” to “e” indicating visit 1 to 5.

#### 147 **Sample collection and transport**

148 Vaginal fluid was obtained by infusing 2 ml of saline solution into the vagina followed by  
149 rotation against the vaginal wall with a speculum and then collecting the vaginal fluid with a  
150 syringe. Approximately 700 µl were immediately transferred to a tube containing 2 ml  
151 RNAprotect (Qiagen, Germany). Tubes were immediately frozen at -20°C, transported at -  
152 20°C within a week and stored at -70°C.

#### 153 **RNA extraction and mRNA enrichment**

154 RNA was extracted from 1 ml vaginal fluid suspension using the MO BIO  
155 PowerMicrobiome™ RNA Isolation Kit (Qiagen, Germany) with pretreatment: Vaginal fluid  
156 was centrifuged at 13,000 rpm for 1 minute. The pellet was resuspended in MoBio lysis buffer  
157 and this suspension was added to the supplied bead tubes filled with 500 µl ice-cold phenol-  
158 chloroformisoamylalcohol solution (Carl Roth, Germany). The bead-suspension mix was  
159 shaken at 5 m/s for 1 minute in 3 intervals which were 2 minutes apart using the MO BIO  
160 PowerLyzer™ (Qiagen, Germany). After centrifugation for 1 minute at 13,000 rpm and 4°C  
161 the upper phase containing the RNA was further processed according to the manufacturer’s  
162 instructions including DNase I treatment. RNA was eluted in 100µl nuclease free water and  
163 vaccum concentrated to 50 µl. The Ribo-Zero Gold rRNA Removal Kit (Epidemiology) by  
164 Illumina (USA) was then used for mRNA enrichment with ethanol precipitation according to  
165 the manufacturer’s instructions. Integrity of RNA was evaluated using a Bioanalyzer 2100  
166 (Agilent, Germany).



## 167 **Library preparation, sequencing and preprocessing of sequencing data**

168 Paired-end mRNA Illumina sequencing libraries were constructed with the Script Seq  
169 Illumina Kit. Strand specific paired end sequencing was performed on the HiSeq 2500  
170 Sequencer to yield  $2 \times 110$  bp paired-end reads. Primers and sequencing adaptors were  
171 removed from raw sequencing data, followed by clipping the bases with quality score  $< 20$   
172 from the reads using Fastq-Mcf [18]. After clipping, the remaining reads shorter than 50 were  
173 removed. Thereafter, the ribosomal RNA reads were eliminated using SortMeRNA v2.0 [19]  
174 with the default parameters.

## 175 **Taxonomy assignment using Kraken**

176 Kraken [20], an accurate and ultra-fast taxonomy assignment tool for metagenomes was used  
177 to determine the taxonomic composition of the metatranscriptome data. Kraken uses the K-  
178 mer strategy and the lowest common ancestor (LCA) algorithm to affiliate a given read to a  
179 taxon. The standard Kraken database from the Kraken program with addition of the human  
180 genome was used to identify human reads and determine the predominant species in the  
181 communities for building the refined Kraken database. This standard database consists of  
182 prokaryote genomes (2786), virus genomes (4418) and with addition of human genome (ver.  
183 GRCh38) was downloaded from NCBI.

184 The refined Kraken database contained 19 species of bacteria (Table S1 sheet 3), including all  
185 species determined by the standard Kraken database which contributed more than 1% of  
186 classified reads, species identified by HMP database with abundance higher than 1% using  
187 BWA, *S. amnii*, *S. sanguinegens* detected by amplicon sequencing and two species of  
188 *Gardnerella*, *Gardnerella sp.* 26-12 and *Gardnerella sp.* 30-4 which were isolated from the  
189 bladder recently [21]. Subsequently, the cleaned putative microbial mRNAs reads were

190 mapped against this refined database. All results on the taxonomic composition in this study  
191 were achieved based on this database.

## 192 **Short reads alignment by BWA**

193 Since Kraken was only used for taxonomy classification, BWA was applied to determine the  
194 expression of functional genes. A customized reference gene database (Table S1 sheet 4)  
195 combining the genes from the urogenital tract subset of the HMP reference genome sequence  
196 data (HMRGD) containing genes of 147 genomes [22] and 9 additional genomes determined  
197 by taxonomy assignment (Table S1 sheet 4, in red and green) as well as the amplicon  
198 sequencing results was used as mapping reference for BWA to map all cleaned putative  
199 mRNA reads for functional profiling. The genes of *Gardnerella sp.* 26-12, *Gardnerella sp.*  
200 30-4 were not included due to the poor quality of the genomes. The short reads alignment was  
201 performed using BWA with the BWA-MEM [23] algorithm. A mapping seed length of 31  
202 which is much longer than the default seed length 19 was applied to achieve more reliable  
203 alignments. To avoid a biased mapping, the reads mapped with mapping quality score  
204 (MAPQ) lower than 10 were excluded. MAPQ contains the Phred-scaled posterior probability  
205 that the mapping position is wrong [24]. A MAPQ of 10 indicates a probability of 10% that  
206 the alignment position is wrong.

## 207 **KEGG Orthologous (KO) gene annotation of customized reference database**

208 The customized short reads alignment reference gene database which was used for BWA was  
209 annotated using KEGG prokaryote protein sequences to calculate the expression level of KO  
210 genes for differential KO gene expression analysis and KEGG pathway enrichment analysis.  
211 The KEGG prokaryote protein sequence database represents a non-redundant protein dataset  
212 of prokaryote (Bacteria and Archaea) on the species level and contains about 7 million non-

213 redundant peptide sequences grouped into 14,390 distinct KO genes. A KO gene contains  
214 several genes from different species with similar function. DIAMOND [25], a much faster  
215 alternative to BLASTX was applied to map the customized short reads alignment reference  
216 sequences against the KEGG prokaryote protein sequence database with its “more sensitive  
217 mode”. To obtain reliable annotation, only alignments with sequence identity  $\geq 50$  and E-  
218 value  $\leq 1e-5$  and query coverage  $\geq 70\%$  were taken into account. By annotating the  
219 reference genes to KO genes, we were able to determine the expression profile of KO genes,  
220 and investigate the functional shifts in BV based on differential expression analysis of KO  
221 genes and perform KEGG pathway enrichment analysis.

## 222 **Differential expression (DE) analysis**

223 All differential expression (DE) analyses were performed using the R package edgeR [26].  
224 The Benjamin Hochberg (BH) method was used to correct the p value of DE analysis with the  
225 false discovery rate (FDR) for multiple comparisons. Genes with FDR smaller than 0.05 were  
226 considered as significantly differentially regulated, which were then used for KEGG pathway  
227 enrichment analysis. The sample groups defined for each comparison are listed in Table S1  
228 sheet 1. The groups defined in column “group for *G. vaginalis*” is for the DE analysis of KO  
229 genes between *G. vaginalis* in communities with no response to metronidazole and with  
230 response. The samples with relative abundance of *G. vaginalis* higher than 20% according to  
231 the taxonomy assignment were taken into account. In these two columns, “NR1” represents  
232 samples at visit 1 from patients with no response to metronidazole after treatment, “NR2”  
233 indicates the samples from the same patients at visit 2. And “WR1” denotes samples at visit 1  
234 from patients with response to metronidazole after treatment, while “WR2” means samples  
235 from the recurrent time point. Column “group for LC LI” is for the DE analysis for KO genes

236 between *L. crispatus* in the communities dominated by *L. crispatus* (“LC”) and *L. iners* in the  
237 communities dominated by *L. iners* (“LI”).

### 238 **KEGG pathway enrichment analysis**

239 KEGG pathway enrichment analysis was performed based on differentially expressed KO  
240 genes (genes with same KO number were grouped together) using the `kegga` function of the R  
241 package `limma` [27]. This R package provides the `kegga` function that enables access to the  
242 KEGG database via REST API. The Fisher’s exact test based on hypergeometric distribution  
243 was used to compute the significance of the enrichment and the. The BH method was used to  
244 correct the p value to FDR for multiple comparison.

### 245 **Detection of putative metronidazole resistance related genes**

246 To detect the expression of previously reported putative metronidazole resistant genes such as  
247 *recA*, *recA*-mediated autopeptidase (*Rma*), peroxiredoxin, nitroimidazole resistance protein  
248 (NIM), ferredoxin/ferredoxin-NADP reductase (FNR), nitroreductase, sialidase and  
249 ferredoxin, we examined the expression level of these genes for *G. vaginalis* in the vaginal  
250 community from patients without response to metronidazole treatment (n=6 patients) as well  
251 as with response (n=4 patients). As most of these genes do not have corresponding KO genes,  
252 we annotated the BWA reference database based on the sequences of these genes using  
253 BLASTN. These sequences were retrieved from ENA by key words of each “ferredoxin,  
254 ferric uptake regulator, NADPH flavin oxidoreductase, nitroreductase, peroxiredoxin,  
255 pyruvate ferredoxin oxidoreductase, *recA*, nitroimidazole resistance, sialidase” plus *G.*  
256 *vaginalis*. In total, 155 unique sequences of *G. vaginalis* were obtained for the annotation of  
257 BWA reference database. The identification of duplicate sequences was done by SeqKit [28].

## 258 **Results**

### 259 **Study population and overview of sequencing results**

260 We studied the vaginal microbiome of 14 patients during and after metronidazole treatment of  
261 BV using metatranscriptome sequencing (Fig. 1). Patients were part of a clinical trial  
262 described elsewhere [5]. For ten patients, samples were derived from two time points (before  
263 (visit 1) and after metronidazole treatment (visit 2). Six of those patients did not respond to  
264 treatment with the antibiotic, so were still BV positive according to Nugent score and four of  
265 them responded to the treatment and were cured. For the other four patients, 5 time points  
266 were analyzed, covering a period of 3 months after treatment. Two of those patients  
267 experienced recurrence, while the other two were cured without recurrence (details in Table  
268 S1 sheet 1). In total, we analyzed 40 vaginal fluid samples, 22 with BV status and 18 without.  
269 Metatranscriptome sequencing resulted in a total of 1,879,945,342 reads. Of these,  
270 1,377,516,082 reads (73%) were left after quality filtering and removal of ribosomal RNA  
271 (Table 1). On average, 34 million reads were analyzed per sample.

### 272 **Construction of the reference genome and gene databases for taxonomic and functional** 273 **profiling**

274 Based on the standard Kraken database, ~11% of the total putative mRNA reads could be  
275 assigned to human for BV and ~56% for health (Table S1 sheet 2). This suggests that the  
276 bacterial load is much lower in health than in BV since the human contamination read is much  
277 higher in health. Interestingly, transcripts from the most abundant 10 species contributed 90%  
278 of the mapped reads (Fig. S1), which is much less diverse than the periodontal  
279 metatranscriptome in which more than 100 species were required to cover 90% of mappable  
280 reads [29]. Using this standard database, 41% of total putative microbial (non-human) mRNA

281 reads could be assigned taxonomically (Table 2). To improve the fraction of taxonomically  
282 assignable reads we then constructed a refined database consisting of all species detected by  
283 the standard Kraken database with an abundance > 1% and species detected with more than  
284 1% of the total putative microbial mRNA reads using the urogenital subset of the HMP  
285 database by BWA. We also added genomes of *S. amnii* and *S. sanguinegens* which had  
286 previously been shown to be highly abundant based on 16S rRNA gene sequencing [5] but  
287 were not contained in either HMP or the standard Kraken reference database. To be able to  
288 identify transcripts from bladder isolates, we added the genomes of *Gardnerella sp.* 26-12 and  
289 *Gardnerella sp.* 30-4 which were isolated from the bladder recently [21]. To make sure that  
290 the transcripts mapped to the *Gardnerella sp.* bladder isolates did not actually originate from  
291 *G. vaginalis*, we included 8 genomes from distinct *G. vaginalis* strains in the refined Kraken  
292 database. For the rest of the species, only the representative genome was used. In total, this  
293 database contained 19 species and 26 genomes (Table S1 sheet 3). Using this refined database  
294 for taxonomic assignment mapping of all putative microbial mRNA reads could be improved  
295 to 77% on average (Table 2). These data show that the active microbiota in BV is much less  
296 diverse than suggested by 16S rRNA amplicon sequencing.

297 For functional assignment, we used a customized reference gene database (Table S1 sheet 4)  
298 containing the genes from the HMP urogenital tract subset database, and added the genes of  
299 additional 9 genomes (see method section for details). To investigate the functional shifts of  
300 the communities, we mapped the cleaned metatranscriptomic reads to this customized  
301 reference gene database using BWA. In total, 31% of total putative mRNA reads for BV and  
302 5% for health could be mapped to this microbial reference gene database with a MAPQ score  
303 higher than 10. Most of the reads were of human origin. However, the sequencing provided  
304 on average 8.9 million reads per sample, which allowed the functional profiling for highly

305 abundant species in the community. The mapping results per sample can be seen in Table S1  
306 sheet 2.

### 307 **Shifts in the taxonomic composition of the active community during 3 months following** 308 **metronidazole treatment**

309 Using the refined Kraken database, the taxonomic composition of transcripts in the 40  
310 analyzed samples was determined. Fig. 1 shows that all BV communities (before  
311 metronidazole treatment, at recurrence, and in patients with no response to treatment) were  
312 dominated by *G. vaginalis*, *A. vaginae*, *S. amnii* and *G. sp.* 26-12. In patients that responded  
313 to treatment and were cured, the metatranscriptomes were dominated by *L. crispatus*, *L. iners*  
314 and *L. jensenii*.

### 315 **Comparison of the taxonomic composition of vaginal fluid samples between** 316 **metatranscriptome and 16S rRNA sequencing**

317 To discover transcriptionally active bacteria which may contribute to the functional shifts in  
318 BV, we compared the taxonomic composition determined using 16S rRNA sequencing [5]  
319 and the taxonomic composition of the metatranscriptome determined by Kraken with the  
320 refined reference database. In health, we did not observe any considerable difference (Table  
321 S1 sheet 6), while in BV large differences between the two datasets were found. Figure 2  
322 shows that most of the abundant species identified in the mRNA sequencing data set were  
323 also identified using 16S rRNA gene amplicon sequencing, although usually at different  
324 abundances. For example, *A. vaginae* comprised 15% of all reads based on 16S rRNA gene  
325 sequencing, but less than 10% in the metatranscriptome dataset. The most pronounced  
326 difference was observed for *G. vaginalis* which comprised on average 37% of relative  
327 abundance in the metatranscriptome and on average only 6% in the 16S rRNA sequencing

328 data. By contrast, the two bladder isolates of *Gardnerella sp.* and *Megasphaera sp.* type 1  
329 were only identified in the metatranscriptome, probably due to the low resolution of the 16S  
330 rRNA gene. This finding suggests that *G. vaginalis* and other *Gardnerella* species are  
331 extremely transcriptionally active in the BV community. In addition, the commonly used 27F  
332 primer has been shown to underrepresent *G. vaginalis* [30].

333 ***L. iners* and *L. crispatus* were mutually exclusive in health and *G. vaginalis* was the most**  
334 **active species in BV**

335 The most abundant active species after metronidazole treatment were *Lactobacillus* species of  
336 which *L. iners* and *L. crispatus* were the most abundant ones (Fig. 2C). They seem to exclude  
337 each other, because high abundant *L. iners* was never accompanied by *L. crispatus* and high  
338 abundant *L. crispatus* was only twice accompanied by low abundant (lower than a quarter of  
339 the abundance of *L. crispatus*) *L. iners*. *L. gasseri* and *L. jensenii* had much lower abundances  
340 and were found together with both *L. crispatus* and *L. iners*. In one patient, the active healthy  
341 community was dominated by *L. jensenii*.

342 In BV, *G. vaginalis* was the most abundant active species. Only two communities of patients  
343 with BV were dominated by other species, namely *A. vaginae* and *S. amnii*. Additional BV  
344 associated species such as *S. sanguinegens* or different *Prevotella sp.* were frequently found  
345 in BV samples, and *Megasphaera sp.* type1 and *Mobiluncus mulieris* were occasionally  
346 found. The only species of *Lactobacillus* found to be active in BV was *L. iners*.

347 ***Gardnerella* species isolated from the bladder were active in BV communities**

348 The bladder was thought to be sterile in healthy women, but it has now been shown that  
349 specific microorganisms are residing in the healthy bladder [21]. Therefore, the bladder has to  
350 be considered as a possible reservoir for pathogens. The high pH of urine may be a favorable



351 environment for several pathogens, including *Gardnerella sp.*. Here we observed that  
352 *Gardnerella sp.* isolated from the bladder (*Gardnerella sp.* 26-12 and *Gardnerella sp.* 30-4)  
353 contributed 15% of all classified reads in BV. Especially, *Gardnerella sp.* 26-12 comprised on  
354 average 12% of all classified reads in BV. These two species were abundant (between 16-18%  
355 of classified reads) in the communities from patients with BV recurrence (Fig. 1, samples  
356 04\_001\_e and 06\_004\_a). From the six patients that did not respond to metronidazole therapy,  
357 three had a high abundance of transcripts from the bladder isolates in their vaginal fluid  
358 samples (samples 05\_001\_a/b, 15\_006\_a/b, 17\_004\_b). In several samples of BV patients,  
359 transcripts from bladder isolates were extremely abundant (between 25-49% of all transcripts)  
360 (samples 13\_022\_a, 07\_001\_a/b, 15\_006\_a/b, 17\_004\_a). Some samples ((04\_001\_a,  
361 06\_004\_c (recurrence) and 06\_001\_a/b, 06\_006\_a/b (without response to treatment)) were  
362 dominated by *S. amnii* which has been discovered in the urine microbiome previously [31,32].  
363 While 16S rRNA gene based studies rely on PCR amplification and are thus extremely  
364 sensitive and also detect dead pathogens, here we report populations which are not only  
365 relatively abundant, but also actively growing. This finding implies that *Gardnerella* species  
366 isolated from the bladder may contribute to recurrence of BV. We hypothesize that the  
367 *Gardnerella* as well as *Sneathia* species taking shelter in the bladder might be able to invade  
368 the vagina once the pH shifts to neutral or alkaline conditions and in such a way they are one  
369 factor causing BV recurrence.

### 370 **Functional profiles in health and disease**

371 In order to profile the function of the communities, all cleaned putative mRNA reads (Table  
372 S1 sheet 2, column C) were mapped using BWA onto a customized reference database  
373 annotated with KEGG ortholog (KO) genes. We compared the functional profiles of samples  
374 from patients in BV (14 patients, 22 samples) with samples from health (after successful

375 metronidazole treatment, (14 patients, 18 samples). The PCA based on the expression of KO  
376 genes clearly showed that there was a large functional difference between BV and health; the  
377 functional profiles formed clearly separated clusters (Fig. 3A). Moreover, the functional  
378 composition in health was more variable than in BV. This is a striking finding, because 16S  
379 rRNA gene sequencing showed a massive increase in diversity in BV [5]. The reason might  
380 be that the different species of *Lactobacillus* which dominate in different individuals in health  
381 have different functional profiles, while the different species that dominate in BV all have  
382 similar functional profiles.

### 383 **Time course of functional profiles during recurrence**

384 To identify functional difference between women with and without recurrence, the functional  
385 profiles of two women with recurrence (patients 04\_001 and 06\_004) were compared to those  
386 of two women without (patients 08\_006 and 13\_019) over a period of three months. Five time  
387 points were analyzed of which the first represented acute BV and the others were after  
388 metronidazole treatment. The principal components analysis of the functional profiles is  
389 shown in Fig. 3B. In acute BV, samples from all four patients clustered together (red circle).  
390 After the treatment, samples from patient 08\_006 who was cured without recurrence moved  
391 into a very dense and distinct cluster (illustrated by the arrow 1 and enclosed by a green  
392 circle). Samples from patient 13\_019 who was also cured, moved to a different cluster after  
393 treatment, shown by arrow 2 and encircled blue.

394 The functional shifts in patient 06\_004, who experienced recurrence at visit 3, were especially  
395 noteworthy: After treatment, the community moved towards a functional profile distinct from  
396 all others (arrow 3). The recurrence of BV caused the community to shift back to the BV  
397 cluster (red circle, arrow 4). At visit 4, the community moved to the healthy cluster (blue  
398 circle) and the patient became healthy according to the Nugent score. We speculate that there

399 was a medical intervention after visit 3 which changed the microbiome but this was not  
400 recorded. Interestingly, the other case of recurrence (patient 04\_001) had a different  
401 progression. From visit 2 to 4, patient 04\_001 seemed to be cured, because these samples  
402 clustered together in the healthy cluster indicated by the blue circle. At visit 5, however,  
403 patient 04\_001 had recurrent BV and the community shifted back again to the BV cluster.  
404 Interestingly, the microbial community of patient 08\_006 was the only one dominated by *L.*  
405 *crispatus* after metronidazole treatment, while all others, including those in the second healthy  
406 cluster, were dominated by *L. iners*. This confirms the previous observation that *L. iners* and  
407 *L. crispatus* are mutually exclusive and suggests that communities dominated by *L. crispatus*  
408 are protected from recurrence.

409 **The inerolysin gene was highly expressed in *L. iners* and genes involved in the**  
410 **production of H<sub>2</sub>O<sub>2</sub> were highly expressed in *L. crispatus***

411 As shown above, *L. iners* and *L. crispatus* dominated different patients after treatment, i.e.  
412 they were mutually exclusive, and *L. crispatus* seemed to have a protective role against  
413 recurrence. Therefore, we compared their genomes and functional profiles with each other. *L.*  
414 *iners* has the smallest genome encoding around 1500 proteins compared to other  
415 *Lactobacillus* species like *L. crispatus* which encodes more than twice as many proteins [33].  
416 To gain more understanding of their different roles in the healthy vaginal microbial  
417 community, we performed a differential expression (DE) analysis based on their KO genes  
418 comparing the expression of KO genes of *L. crispatus* in *L. crispatus* dominated samples (n =  
419 4) with the expression of KO genes of *L. iners* in *L. iners* dominated samples (n = 11). Fig.  
420 3C shows that the two species share 569 KO genes, while 58 are unique to *L. iners* and 244  
421 are unique for *L. crispatus*. The DE analysis identified 584 significantly differentially  
422 expressed KO genes, of which 355 were up-regulated in *L. crispatus* (Table S1 sheet 10).

423 Among the top 100 most differentially expressed KO genes in terms of FDR value, 89 were  
424 up-regulated in *L. crispatus*, indicating *L. crispatus* possesses far more diverse functions than  
425 *L. iners*. Remarkably, genes assumed to be involved in the production of H<sub>2</sub>O<sub>2</sub> (pyruvate  
426 oxidase, NADH oxidase, glycolate oxidase) [34,35] were highly expressed in *L. crispatus*  
427 (Fig. 3C) suggesting a high level of hydrogen peroxide in vaginal microbiota dominated by *L.*  
428 *crispatus*. Hydrogen peroxide provides protection against pathogens for the symbiotic vaginal  
429 community [36]. An iron transport system was found to be highly expressed in *L. crispatus*  
430 and it is absent in the genome of *L. iners*. On the other hand, we identified a gene encoding  
431 inerolysin (INY) which was highly expressed (log<sub>2</sub> counts per million mapped reads =10.18)  
432 in *L. iners*, but absent in the genome of *L. crispatus* (Fig. 3C, Table S1 sheet 10). INY, a  
433 cholesterol-dependent cytolysin (CDC) produced by *L. iners*, is a pore-forming toxin that is  
434 activated by reducing agents and inhibited by excess cholesterol [15]. CDCs were formerly  
435 annotated as “thiol-activated cytolysins” [37]. Interestingly, we also found the orthologous  
436 gene (K11031) of inerolysin expressed in *G. vaginalis* (details in Table S1 sheet 7). These  
437 findings show that *L. iners* exerts a similar activity as the BV pathogen *G. vaginalis* indicating  
438 it may initiate the dysbiotic shift of the vaginal flora thus contribute to the pathogenesis of BV  
439 as well as to recurrence.

#### 440 **Biofilm related pathways and vitamin B metabolism were up-regulated in BV**

441 Using KEGG pathway enrichment analysis based on differentially expressed KO genes  
442 between BV and health, we found that in BV more pathways were enriched in the up-  
443 regulated KO genes than down-regulated genes (Table S1 sheet 9). As shown in Fig. 4,  
444 pathways related to the biosynthesis and metabolism of amino acids and vitamin B6  
445 metabolism were highly enriched in up-regulated KO genes. Additionally, pathways of other  
446 B vitamins were enriched in up-regulated KO genes in BV as well, though the FDR did not

447 reach significance level, namely, thiamine metabolism (P=0.019, FDR=0.196), pantothenate  
448 and CoA biosynthesis (P=0.010, FDR=0.134), and riboflavin metabolism (P = 0.117, FDR =  
449 0.526) (Table S1 sheet 9). Interestingly, lipopolysaccharide (LPS) biosynthesis, flagellar  
450 assembly and bacterial chemotaxis (P = 0.007, FDR = 0.111, Table S1 sheet 9) which are  
451 essential for living in biofilms were strongly up-regulated (Fig. 4).

#### 452 ***In vivo* expression of putative metronidazole resistance associated genes in *G. vaginalis***

453 Metronidazole is a prodrug which requires anaerobic conditions for enzymatic reduction  
454 within the cell to transform it into an active form [8]. Several enzymes are involved in the  
455 reduction of metronidazole such as ferredoxin, ferredoxin/ferredoxin-NADP reductase (FNR),  
456 and nitroreductase [8,38-41]. The reduced metronidazole can introduce DNA strand breaks  
457 thus leading to the death of the pathogens. Accordingly, genes responsible for DNA repair  
458 like recA and recA-mediated autopeptidase (Rma) might contribute to resistance against  
459 metronidazole [42]. Moreover, a gene named nitroimidazole resistance gene (NIM) was  
460 shown to be related to the resistance against metronidazole in *Bacteroides fragilis* [43]. To  
461 clarify the possible contribution of these genes to metronidazole resistance of the vaginal  
462 microbiota, we examined the expression (Table S1 sheet 12) of these genes in *G. vaginalis* by  
463 comparing their expression in the communities with later response to metronidazole and  
464 without at visit 1 (acute BV). For this analysis, BV communities from 10 patients were  
465 analyzed in which the level of *G. vaginalis* transcripts was > 20%. Six of these patients did  
466 not respond to treatment and four were initially cured. Although *A. vaginae* and *S. amnii* are  
467 also key players in BV we did not analyze them here since there were two few samples  
468 dominated by them. As shown in Fig. S2, there was no clear expression pattern for most of  
469 these genes (detailed data in Table S1 sheet 12). However, ferredoxin/ferredoxin-NADP  
470 reductase (FNR) was clearly down-regulated in *G. vaginalis* in communities with no response

471 to the treatment (with relative abundance  $0.014 \pm 0.014\%$  versus  $0.059 \pm 0.031\%$ , Wilcoxon  
472 test P-value = 0.0381, relative abundance = read count of given genes of *G. vaginalis* / read  
473 count of *G. vaginalis*). FNR is involved in activating metronidazole [41] thus its weak  
474 expression indicates the lack of the active antibiotic, in accordance with the lack of response  
475 in those patients.

476 RecA and RecA-mediated autopeptidase (Rma) were up-regulated in some but not all  
477 communities that did not respond to metronidazole (with relative abundance  $0.047 \pm 0.015\%$ ,  
478  $0.034 \pm 0.026\%$  versus  $0.036 \pm 0.017\%$ ,  $0.022 \pm 0.028\%$ , respectively). RecA and RecA-  
479 mediated autopeptidase are essential genes in SOS response [44] responsible for DNA repair  
480 in bacteria. They may play a crucial role in survival of bacteria after treatment with a DNA  
481 damaging agent like metronidazole.

482 **CRISPR associated protein and adenine methyltransferase genes of *G. vaginalis* were**  
483 **strongly up-regulated in vaginal fluids of patients not responding to treatment**

484 We then performed a global analysis of differential expression of KO genes of *G. vaginalis* in  
485 these same communities (visit 1, 10 BV samples with > 20% transcripts from *G. vaginalis* (6  
486 patients that did not respond to treatment and 4 that were initially cured). We observed that  
487 there were 24 KO genes highly up-regulated with FDR  $\leq 0.05$  (log<sub>2</sub> fold change up to 12.4)  
488 in communities without response. Strikingly, among the top ten most strongly up-regulated  
489 KO genes, seven were *cas* genes [45] (CRISPR-associated protein genes, *cas1-3*, *casA-D*)  
490 (Fig. 5). Cas proteins have a dual function; they can perform homology-directed repair as well  
491 as degrade foreign DNA [46].

492 *yhdJ* and *licD* were the most strongly up-regulated genes with log<sub>2</sub> fold change above 10, of  
493 which *yhdJ* encodes an adenine-specific DNA-methyltransferase and *licD* encodes a

494 lipopolysaccharide cholinephosphotransferase. The DNA adenine methyltransferase is an  
495 essential part of the restriction modification system that protects bacteria from digesting their  
496 own genome via their restriction enzymes [47].

497 There were 32 KO genes down-regulated but the fold change values were not as high as for  
498 the up-regulated genes. *galK* (galactokinase) was identified as the most strongly down-  
499 regulated gene with a log<sub>2</sub> fold change of -5.6.

500 These findings suggest that CRISPR-Cas, a phage defense mechanism with a dual function,  
501 might mitigate the DNA damaging effect of metronidazole and thus may be one of the reasons  
502 for lack of response of the vaginal microbiota to treatment. In addition, lack of expression of  
503 an enzyme (FNR) that transforms the metronidazole prodrug into the active form might also  
504 contribute to lack of response to treatment.

## 505 **Discussion**

506 The aim of this study was to identify functional patterns in the vaginal fluid microbiota in  
507 health and BV. In particular, we compared metatranscriptomes of recurrent and non-recurrent  
508 patients and of patients who did and did not respond to metronidazole treatment. This is the  
509 first study to investigate the compositional as well as functional alterations of the vaginal  
510 microbiota from patients with BV during treatment with the antibiotic metronidazole *in vivo*  
511 using the metatranscriptomic approach. We found clear patterns which allowed us to  
512 formulate novel hypotheses. Since our analysis is based on a relatively small number of 14  
513 patients, our findings should be followed up in larger patient groups with more cases of  
514 recurrence and more cases of lack of response to antibiotic treatment.

515 We observed that *G. vaginalis* was much more dominant based on the abundance of its  
516 transcripts than based on the 16S rRNA amplicon sequencing analysis. This suggests that *G.*

517 *vaginalis* is transcriptionally more active than other vaginal bacteria; moreover, the  
518 commonly used 27F primer was previously shown to underrepresent *G. vaginalis* [30]. We  
519 found that the functional profiles in health and BV were massively different. Interestingly, *L.*  
520 *crispatus* and *L. iners* were the dominant species in health and communities were dominated  
521 by either one or by the other. There were many factors observed by laboratory or genomic  
522 studies [34,48,49] which show that more protection is provided by *L. crispatus* rather than by  
523 *L. iners*. *L. crispatus* has the ability to produce hydrogen peroxide to prevent pathogen  
524 colonization, whereas *L. iners* does not [34]. Furthermore, an iron transport system was found  
525 in the genome of *L. crispatus* and not in *L. iners* suggesting that *L. crispatus* can capture iron  
526 released by the host during menstruation away from potential pathogens [48]. On the other  
527 hand, *L. iners* can produce inerolysin, a pore-forming cytolysin that enables nutrient  
528 acquisition from host cells providing it with an advantage when conditions are scarce [49].  
529 Strikingly, an ortholog of inerolysin was found highly expressed in *G. vaginalis* in BV. This  
530 is the first *in vivo* study revealing that *L. iners* behaves pathogenic in health after antibiotic  
531 treatment using metatranscriptome analysis. These findings suggest that *L. iners* can initiate  
532 the dysbiotic shift of the vaginal flora and contribute to the pathogenesis of BV as well as to  
533 recurrence. These observations may also explain why *L. crispatus* is more beneficial than *L.*  
534 *iners* and why *L. iners* has the ability to thrive faster after antibiotic treatment.

535 Moreover, *Gardnerella* species isolated from the bladder were highly active in several  
536 patients with BV, including two patients with recurrent BV. Thus re-colonization of the  
537 vagina by pathogens residing in the bladder should be considered as an important mechanism  
538 contributing to recurrence of BV.

539 Many potential reasons are discussed for recurrence and the occasional lack of response to  
540 metronidazole treatment. For example, it has been reported that sexual activity can introduce



541 pathogens thus may also contribute to the recurrence of BV [11], dosage of metronidazole  
542 may have been too low for the patient, or highly virulent strains of *G. vaginalis* may be  
543 residing in this particular non-responding patient.

544 In our metatranscriptome analysis we found evidence for mechanisms that hinder the  
545 activation of the metronidazole prodrug, or mitigate the damage that metronidazole inflicts on  
546 DNA, and thus could be important reasons for the lack of response in some women.

547 We show for the first time that the FNR gene of *G. vaginalis* was down-regulated in those  
548 patients that did not respond to metronidazole. This gene is required for the activation of  
549 metronidazole in anaerobes [41].

550 Adenine methyltransferase was the most strongly up-regulated gene of *G. vaginalis* in  
551 communities from patients without response to metronidazole suggesting that it may play a  
552 role in protecting DNA from damage. Studies have provided compelling evidence for DNA  
553 methyltransferases 1 (DNMT1) acting as a regulator of genome integrity and as an early  
554 responder to DNA double strand breaks in human cells [50], but the explicit role of DNMTs  
555 in DNA strand break repair for bacteria remains to be elucidated.

556 Remarkably, *cas* genes of *G. vaginalis* were highly up-regulated in *G. vaginalis* from VMB  
557 communities of patients that did not respond to metronidazole treatment. The CRISPR  
558 (Clustered Regularly Interspaced Short Palindromic Repeats)-Cas (CRISPR-associated  
559 proteins) genes are present in about half of all Bacteria and most Archaea [51]; they represent  
560 a mechanism of adaptive immunity which protects the prokaryotic cell against foreign DNA  
561 and has been developed into a universal tool for genome editing [52]. The *cas* genes of *G.*  
562 *vaginalis* belong to the *E. coli* subtype and were found in about half of the clinical isolates  
563 [45]. Their up-regulation might reflect increased phage attacks in BV. Phages have been  
564 hypothesized to be crucial for the etiology of BV by causing the collapse of *Lactobacillus*

565 populations [53]; accordingly, *L. iners* upregulates its CRISPR-Cas system in BV [16]. More  
566 than 400 annotated prophage sequences were found in 39 *Gardenerella* isolates from the  
567 bladder [21]. They might be induced to enter the lytic cycle by the change in pH  
568 accompanying the shift to BV.

569 The upregulation of CRISPR-Cas system genes in *G. vaginalis* from those patients that did  
570 not respond to treatment by metronidazole suggests that the CRISPR-Cas system might have a  
571 role in not only defending the host against phages, but also in mitigating the DNA damaging  
572 effect of metronidazole. In addition to providing adaptive immunity, CRISPR-Cas systems  
573 can have various additional functions [54] and it was shown that they can protect the cell  
574 against DNA damaging agents [46]. The Cas1 enzyme of *E. coli* (YgbT) physically and  
575 genetically interacts with the DNA repair system (RecBC, RuvB) and is recruited to DNA  
576 double strand breaks; moreover, YgbT is necessary for resistance of *E. coli* to DNA damage  
577 caused by the genotoxic antibiotic mitomycin C or UV light [46]. Our findings suggest that  
578 the CRISPR-Cas system may protect the vaginal microbiota against the DNA damaging effect  
579 of metronidazole. If experimentally confirmed, this finding might open a new path to fight  
580 bacterial resistance against DNA damaging agents.

## 581 **Conclusions**

582 We hypothesize that colonization by *L. iners* and re-infection through the bladder contribute  
583 to recurrence of BV. CRISPR-Cas, a phage defense mechanism with a dual function, might  
584 mitigate the DNA damaging effect of metronidazole and thus may be one of the reasons for  
585 lack of response of the vaginal microbiota to treatment. This first *in vivo* study of the  
586 metatranscriptome landscape of vaginal fluid microbiota during metronidazole treatment  
587 provides a wealth of new understanding towards the possible mechanisms of lack of response

588 to metronidazole and recurrence in BV. These findings may help to develop more efficient  
589 novel therapies to improve the treatment of BV and prevent recurrence. A completely new  
590 role for Cas proteins in microbial communities is hypothesized which warrants closer  
591 inspection.

## 592 **Declarations**

### 593 **Ethics approval and consent to participate**

594 The protocol of the clinical trial [5] was approved by the local ethics committee  
595 (Ärzttekammer Nordrhein - Medical Association North Rhine) and written consent was  
596 obtained from all participants. The clinical trial was conducted in accordance with the  
597 Declaration of Helsinki on Ethical Principles for Medical Research Involving Human  
598 Subjects. Principles and guidelines for good clinical practice were followed.

### 599 **Consent for publication**

600 Not applicable

### 601 **Availability of data and material**

602 The clinical trial was registered on ClinicalTrials.gov with the identifier NCT02687789. The  
603 metatranscriptome sequencing data of this subgroup analysis have been deposited in European  
604 Nucleotide Archive and are accessible through study accession number PRJEB21446.

### 605 **Competing interests**

606 The authors have read the journal's policy. CM and CA have the following competing  
607 interests: they work for the company Dr. August Wolff GmbH & Co. KG Arzneimittel which

608 designed and conducted the clinical study. However, they had no influence on data analysis  
609 and interpretation, or the decision to submit the work for publication.

### 610 **Funding**

611 This work was supported by ZIM project grant KF3134201MD3 of the Bundesministerium  
612 für Wirtschaft und Energie (BMWi), Germany. The clinical study was funded by Dr. August  
613 Wolff GmbH & Co. KG Arzneimittel within the ZIM project KF3134201MD3.

### 614 **Authors' contributions**

615 This study was designed by IWD and CG. CM and CA provided the clinical samples. RNA  
616 extraction and mRNA enrichment was performed by CG. SB prepared cDNA libraries, and  
617 performed Illumina sequencing. Z-LD performed all the data analyses. Data interpretation and  
618 visualization were done by IWD, Z-LD and CG. Z-LD and CG wrote the manuscript draft,  
619 and all authors reviewed the manuscript.

### 620 **Acknowledgements**

621 We would like to thank Dr. Juergen Tomasch for stimulating discussions and constructive  
622 suggestions and iMED program in Helmholtz association for support.

623

624

625

Reference List

626

- 627 1. Ravel J, Gajer P, Abdo Z, Schneider GM, Koenig SS, McCulle SL *et al.*: **Vaginal**  
628 **microbiome of reproductive-age women.** *Proc Natl Acad Sci U S A* 2011, **108 Suppl**  
629 **1:** 4680-4687.
- 630 2. van de Wijgert JH, Borgdorff H, Verhelst R, Crucitti T, Francis S, Verstraelen H *et al.*:  
631 **The vaginal microbiota: what have we learned after a decade of molecular**  
632 **characterization?** *PLoS One* 2014, **9:** e105998.
- 633 3. Onderdonk AB, Delaney ML, Fichorova RN: **The Human Microbiome during**  
634 **Bacterial Vaginosis.** *Clin Microbiol Rev* 2016, **29:** 223-238.
- 635 4. Dols JA, Molenaar D, van der Helm JJ, Caspers MP, de KA-B, Schuren FH *et al.*:  
636 **Molecular assessment of bacterial vaginosis by Lactobacillus abundance and**  
637 **species diversity.** *BMC Infect Dis* 2016, **16:** 180.
- 638 5. Gottschick C, Deng Z-L, Vital M, Masur C, Abels C, Pieper D *et al.*: **Treatment of**  
639 **biofilms in bacterial vaginosis by an amphoteric tenside pessary - clinical study and**  
640 **microbiome analysis.** *Microbiome* 2017, **in press.**
- 641 6. Bradshaw CS, Pirotta M, De GD, Hocking JS, Morton AN, Garland SM *et al.*: **Efficacy**  
642 **of oral metronidazole with vaginal clindamycin or vaginal probiotic for bacterial**  
643 **vaginosis: randomised placebo-controlled double-blind trial.** *PLoS One* 2012, **7:**  
644 e34540.
- 645 7. Lofmark S, Edlund C, Nord CE: **Metronidazole is still the drug of choice for**  
646 **treatment of anaerobic infections.** *Clin Infect Dis* 2010, **50 Suppl 1:** S16-S23.
- 647 8. Mendz GL, Megraud F: **Is the molecular basis of metronidazole resistance in**  
648 **microaerophilic organisms understood?** *Trends Microbiol* 2002, **10:** 370-375.
- 649 9. Hilbert DW, Smith WL, Paulish-Miller TE, Chadwick SG, Toner G, Mordechai E *et al.*:  
650 **Utilization of molecular methods to identify prognostic markers for recurrent**  
651 **bacterial vaginosis.** *Diagn Microbiol Infect Dis* 2016, **86:** 231-242.
- 652 10. Ferreira CST, Donders GG, Parada CMGL, Tristao ADR, Fernandes T, da Silva MG *et*  
653 *al.*: **Treatment failure of bacterial vaginosis is not associated with higher loads of**  
654 **Atopobium vaginae and Gardnerella vaginalis.** *J Med Microbiol* 2017, **66:** 1217-  
655 1224.
- 656 11. Bradshaw CS, Morton AN, Hocking J, Garland SM, Morris MB, Moss LM *et al.*: **High**  
657 **recurrence rates of bacterial vaginosis over the course of 12 months after oral**  
658 **metronidazole therapy and factors associated with recurrence.** *J Infect Dis* 2006,  
659 **193:** 1478-1486.
- 660 12. Sobel JD, Schmitt C, Meriwether C: **Long-term follow-up of patients with bacterial**  
661 **vaginosis treated with oral metronidazole and topical clindamycin.** *J Infect Dis*  
662 1993, **167:** 783-784.

- 663 13. Machado D, Castro J, Palmeira-de-Oliveira A, Martinez-de-Oliveira J, Cerca N:  
664 **Bacterial Vaginosis Biofilms: Challenges to Current Therapies and Emerging**  
665 **Solutions.** *Front Microbiol* 2015, **6**: 1528.
- 666 14. Turovskiy Y, Sutyak NK, Chikindas ML: **The aetiology of bacterial vaginosis.** *J Appl*  
667 *Microbiol* 2011, **110**: 1105-1128.
- 668 15. Petrova MI, Reid G, Vaneechoutte M, Lebeer S: **Lactobacillus iners: Friend or Foe?**  
669 *Trends Microbiol* 2016.
- 670 16. Macklaim JM, Fernandes AD, Di Bella JM, Hammond JA, Reid G, Gloor GB:  
671 **Comparative meta-RNA-seq of the vaginal microbiota and differential expression**  
672 **by Lactobacillus iners in health and dysbiosis.** *Microbiome* 2013, **1**: 12.
- 673 17. Mohammadzadeh F, Dolatian M, Jorjani M, Alavi MH: **Diagnostic value of Amsel's**  
674 **clinical criteria for diagnosis of bacterial vaginosis.** *Glob J Health Sci* 2014, **7**: 8-14.
- 675 18. Aronesty E: **ea-utils: Command-line tools for processing biological sequencing data.**  
676 *Durham, NC: Expression Analysis* 2011.
- 677 19. Kopylova E, Noe L, Touzet H: **SortMeRNA: fast and accurate filtering of ribosomal**  
678 **RNAs in metatranscriptomic data.** *Bioinformatics* 2012, **28**: 3211-3217.
- 679 20. Wood DE, Salzberg SL: **Kraken: ultrafast metagenomic sequence classification**  
680 **using exact alignments.** *Genome Biol* 2014, **15**: R46.
- 681 21. Malki K, Shapiro JW, Price TK, Hilt EE, Thomas-White K, Sircar T *et al.*: **Genomes of**  
682 **Gardnerella Strains Reveal an Abundance of Prophages within the Bladder**  
683 **Microbiome.** *PLoS One* 2016, **11**: e0166757.
- 684 22. Methe BA, Nelson KE, Pop M, Creasy HH, Giglio MG, Huttenhower C *et al.*: **A**  
685 **framework for human microbiome research.** *Nature* 2012, **486**: 215-221.
- 686 23. Li H: **Aligning sequence reads, clone sequences and assembly contigs with BWA-**  
687 **MEM.** *arXiv preprint arXiv:1303.3997* 2013.
- 688 24. Li H, Handsaker B, Wysoker A, Fennell T, Ruan J, Homer N *et al.*: **The Sequence**  
689 **Alignment/Map format and SAMtools.** *Bioinformatics* 2009, **25**: 2078-2079.
- 690 25. Buchfink B, Xie C, Huson DH: **Fast and sensitive protein alignment using**  
691 **DIAMOND.** *Nat Methods* 2015, **12**: 59-60.
- 692 26. Robinson MD, McCarthy DJ, Smyth GK: **edgeR: a Bioconductor package for**  
693 **differential expression analysis of digital gene expression data.** *Bioinformatics* 2010,  
694 **26**: 139-140.
- 695 27. Ritchie ME, Phipson B, Wu D, Hu Y, Law CW, Shi W *et al.*: **limma powers**  
696 **differential expression analyses for RNA-sequencing and microarray studies.**  
697 *Nucleic Acids Res* 2015, **43**: e47.

- 698 28. Shen W, Le S, Li Y, Hu F: **SeqKit: A Cross-Platform and Ultrafast Toolkit for**  
699 **FASTA/Q File Manipulation.** *PLoS One* 2016, **11**: e0163962.
- 700 29. Deng ZL, Szafranski SP, Jarek M, Bhujju S, Wagner-Dobler I: **Dysbiosis in chronic**  
701 **periodontitis: Key microbial players and interactions with the human host.** *Sci Rep*  
702 2017, **7**: 3703.
- 703 30. Frank JA, Reich CI, Sharma S, Weisbaum JS, Wilson BA, Olsen GJ: **Critical**  
704 **evaluation of two primers commonly used for amplification of bacterial 16S rRNA**  
705 **genes.** *Appl Environ Microbiol* 2008, **74**: 2461-2470.
- 706 31. Whiteside SA, Razvi H, Dave S, Reid G, Burton JP: **The microbiome of the urinary**  
707 **tract--a role beyond infection.** *Nat Rev Urol* 2015, **12**: 81-90.
- 708 32. Gottschick C, Deng Z-L, Vital M, Masur C, Abels C, Pieper D *et al.*: **The urinary**  
709 **microbiota of men and women and its changes in women during bacterial vaginosis**  
710 **and antibiotic treatment.** *Microbiome* 2017, **5**: 99.
- 711 33. France MT, Mendes-Soares H, Forney LJ: **Genomic Comparisons of Lactobacillus**  
712 **crispatus and Lactobacillus iners Reveal Potential Ecological Drivers of**  
713 **Community Composition in the Vagina.** *Appl Environ Microbiol* 2016, **82**: 7063-  
714 7073.
- 715 34. Ojala T, Kankainen M, Castro J, Cerca N, Edelman S, Westerlund-Wikstrom B *et al.*:  
716 **Comparative genomics of Lactobacillus crispatus suggests novel mechanisms for**  
717 **the competitive exclusion of Gardnerella vaginalis.** *BMC Genomics* 2014, **15**: 1070.
- 718 35. Hertzberger R, Arents J, Dekker HL, Pridmore RD, Gysler C, Kleerebezem M *et al.*:  
719 **H(2)O(2) production in species of the Lactobacillus acidophilus group: a central**  
720 **role for a novel NADH-dependent flavin reductase.** *Appl Environ Microbiol* 2014,  
721 **80**: 2229-2239.
- 722 36. Cardone A, Zarcone R, Borrelli A, Di CA, Russo A, Tartaglia E: **Utilisation of**  
723 **hydrogen peroxide in the treatment of recurrent bacterial vaginosis.** *Minerva*  
724 *Ginecol* 2003, **55**: 483-492.
- 725 37. Macklaim JM, Gloor GB, Anukam KC, Cribby S, Reid G: **At the crossroads of vaginal**  
726 **health and disease, the genome sequence of Lactobacillus iners AB-1.** *Proc Natl*  
727 *Acad Sci U S A* 2011, **108 Suppl 1**: 4688-4695.
- 728 38. Tsugawa H, Suzuki H, Satoh K, Hirata K, Matsuzaki J, Saito Y *et al.*: **Two amino acids**  
729 **mutation of ferric uptake regulator determines Helicobacter pylori resistance to**  
730 **metronidazole.** *Antioxid Redox Signal* 2011, **14**: 15-23.
- 731 39. Wassmann C, Hellberg A, Tannich E, Bruchhaus I: **Metronidazole resistance in the**  
732 **protozoan parasite Entamoeba histolytica is associated with increased expression**  
733 **of iron-containing superoxide dismutase and peroxiredoxin and decreased**  
734 **expression of ferredoxin 1 and flavin reductase.** *J Biol Chem* 1999, **274**: 26051-  
735 26056.



- 736 40. Leitsch D, Burgess AG, Dunn LA, Krauer KG, Tan K, Duchene M *et al.*:  
737 **Pyruvate:ferredoxin oxidoreductase and thioredoxin reductase are involved in 5-**  
738 **nitroimidazole activation while flavin metabolism is linked to 5-nitroimidazole**  
739 **resistance in *Giardia lamblia*. *J Antimicrob Chemother* 2011, **66**: 1756-1765.**
- 740 41. Ishii M, Ueda Y, Yoon KS, Igarashi Y, Kodama T: **Purification and characterization**  
741 **of ferredoxin from *Hydrogenobacter thermophilus* strain TK-6. *Biosci Biotechnol***  
742 ***Biochem* 1996, **60**: 1513-1515.**
- 743 42. Steffens LS, Nicholson S, Paul LV, Nord CE, Patrick S, Abratt VR: ***Bacteroides***  
744 ***fragilis* RecA protein overexpression causes resistance to metronidazole. *Res***  
745 ***Microbiol* 2010, **161**: 346-354.**
- 746 43. Lofmark S, Fang H, Hedberg M, Edlund C: **Inducible metronidazole resistance and**  
747 ***nim* genes in clinical *Bacteroides fragilis* group isolates. *Antimicrob Agents***  
748 ***Chemother* 2005, **49**: 1253-1256.**
- 749 44. Michel B: **After 30 years of study, the bacterial SOS response still surprises us.**  
750 ***PLoS Biol* 2005, **3**: e255.**
- 751 45. Pleckaityte M, Zilnyte M, Zvirbliene A: **Insights into the CRISPR/Cas system of**  
752 ***Gardnerella vaginalis*. *BMC Microbiol* 2012, **12**: 301.**
- 753 46. Babu M, Beloglazova N, Flick R, Graham C, Skarina T, Nocek B *et al.*: **A dual**  
754 **function of the CRISPR-Cas system in bacterial antiviral immunity and DNA**  
755 **repair. *Mol Microbiol* 2011, **79**: 484-502.**
- 756 47. Pukkila PJ, Peterson J, Herman G, Modrich P, Meselson M: **Effects of high levels of**  
757 **DNA adenine methylation on methyl-directed mismatch repair in *Escherichia coli*.**  
758 ***Genetics* 1983, **104**: 571-582.**
- 759 48. France MT, Mendes-Soares H, Forney LJ: **Genomic Comparisons of *Lactobacillus***  
760 ***crispatus* and *Lactobacillus iners* Reveal Potential Ecological Drivers of**  
761 **Community Composition in the Vagina. *Appl Environ Microbiol* 2016, **82**: 7063-**  
762 **7073.**
- 763 49. Rampersaud R, Planet PJ, Randis TM, Kulkarni R, Aguilar JL, Lehrer RI *et al.*:  
764 **Inerolysin, a cholesterol-dependent cytolysin produced by *Lactobacillus iners*. *J***  
765 ***Bacteriol* 2011, **193**: 1034-1041.**
- 766 50. Ha K, Lee GE, Palii SS, Brown KD, Takeda Y, Liu K *et al.*: **Rapid and transient**  
767 **recruitment of DNMT1 to DNA double-strand breaks is mediated by its interaction**  
768 **with multiple components of the DNA damage response machinery. *Hum Mol Genet***  
769 **2011, **20**: 126-140.**
- 770 51. Makarova KS, Wolf YI, Alkhnbashi OS, Costa F, Shah SA, Saunders SJ *et al.*: **An**  
771 **updated evolutionary classification of CRISPR-Cas systems. *Nat Rev Microbiol***  
772 **2015, **13**: 722-736.**



773 52. Doudna JA, Charpentier E: **Genome editing. The new frontier of genome engineering**  
774 **with CRISPR-Cas9.** *Science* 2014, **346**: 1258096.

775 53. Blackwell AL: **Vaginal bacterial phaginosi**? *Sex Transm Infect* 1999, **75**: 352-353.

776 54. Westra ER, Buckling A, Fineran PC: **CRISPR-Cas systems: beyond adaptive**  
777 **immunity.** *Nat Rev Microbiol* 2014, **12**: 317-326.

778

779

780

781 **Figures, tables and additional files**

782 **Fig. 1: Taxonomic composition of vaginal fluid metatranscriptomes in BV and after**  
783 **treatment with metronidazole.** Species with relative abundance smaller than 2% in all  
784 samples were grouped into “Others”. The red dot on top of the samples indicates BV. The  
785 digits indicate the patient ID, while the letters a-e denote visit 1-5. After the first sampling at  
786 visit 1 the patients were treated with metronidazole. Total putative bacterial mRNA reads  
787 were mapped to the refined reference database using Kraken (see Methods for details). BV  
788 status was determined by Nugent score.

789 **Fig. 2: Average taxonomic composition of vaginal fluid samples in BV determined by**  
790 **16S rRNA amplicon sequencing (A) and metatranscriptome sequencing (B) and**  
791 **taxonomic composition of communities on the species level determined by**  
792 **metatranscriptome sequencing in health and BV (C).** In A, amplicon sequencing was  
793 performed as described in our previous study [5] using primers V1-V2. For B and C,  
794 taxonomy was assigned based on all cleaned reads after removal of human reads using  
795 Kraken and the refined reference database. Species with average relative abundance over 2%  
796 are shown in A and B. Relative average abundance was calculated based on all mapped reads.  
797 Mean and standard error are shown. In C, red and pink dots on top of the heatmap indicate  
798 paired samples of patients which developed recurrence.

799 **Fig. 3: Distinct functional profiles in health and BV (A), temporal dynamics of the**  
800 **metatranscriptome during treatment (B), and differential KO gene expression of**  
801 ***Lactobacillus crispatus* and *L. iners* (C).** A) Principal components analysis of KO gene  
802 expression shows highly similar community activity in BV which is clearly distinct but much  
803 more variable in health. B) Time course based on PCA of functional profiles from four  
804 women during treatment and recurrence over a period of three months (five sampling time

805 points). Two women with recurrence (pink and blue color range) and two women without  
806 recurrence (green and orange color range) are shown. In the figure legend, BV indicates time  
807 point with BV, R indicates the recurrence and H represents health. The green and blue circles  
808 highlight healthy clusters, respectively, while the red circle highlights samples from BV. The  
809 arrows denote the temporal shifts of the communities during the treatment. C) *L. crispatus*  
810 and *L. iners* exhibit distinct function activities. The Venn diagram indicates the unique KO  
811 genes of *L. crispatus* and *L. iners* as well as their shared KO genes. The innermost ring  
812 denotes the expression of KO genes by log<sub>2</sub>CPM, the outer ring illustrates the fold change of  
813 the expression of KO genes between *L. crispatus* dominated communities and *L. iners*  
814 dominated communities by log<sub>2</sub>FC. The small red triangle marks the inerolysin gene, while  
815 blue triangles mark the genes involved in the production of hydrogen peroxide.

816 **Fig. 4: The functional shifts on KEGG pathways in BV communities.** The size of the dot  
817 indicates the number of up-regulated genes in each pathway, and the x-axis denotes the ratio  
818 of number of up-regulated genes in a given pathway divided by number of expressed genes in  
819 this pathway.

820 **Fig. 5: Seven *cas* genes and a methyltransferase gene of *G. vaginalis* were highly up-**  
821 **regulated in communities which did not respond to the treatment.** KO genes with FDR  
822  $\leq 0.05$  are colored in red or turquoise (significantly differentially regulated) while FDR  $>$   
823  $0.05$  are in grey.

824

825 **Table 1. Overview of sequencing results**

| Overview of sequencing results                       | BV (22 samples)        | Health (18 samples)     |
|------------------------------------------------------|------------------------|-------------------------|
| raw reads                                            | 44,503,332 ± 8,934,125 | 50,048,447 ± 10,989,072 |
| cleaned reads after quality control and rRNA removal | 32,506,992 ± 5,955,546 | 36,797,904 ± 6,934,913  |
| putative microbial mRNA reads                        | 27,524,573 ± 6,035,462 | 8,686,750 ± 5,867,867   |

826

827 **Table 2. Mapping statistics using Kraken and BWA**

| Mapping statistics                           | % mapped putative microbial mRNA reads |
|----------------------------------------------|----------------------------------------|
| standard Kraken database                     | 40.55 ± 23.93                          |
| refined Kraken database                      | 77.22 ± 14.44                          |
| customized reference gene database using BWA | ~ 78.02 ± 16.31                        |

828

829 **Fig. S1: The dominance of the vaginal microbiome in BV and health based on**  
830 **metatranscriptome with the standard Kraken database.** Red denotes the dominance curve  
831 in BV while blue represents the dominance in health. Y-axis indicates the cumulative relative  
832 abundance.

833 **Fig. S2: Differential expression of putative metronidazole resistance associated genes of**  
834 ***G. vaginalis* in vaginal fluid microbiota that did not respond to treatment.** The expression  
835 value was calculated based on relative abundance of reads mapped onto *G. vaginalis* using  
836 BWA. “NR1” (No Response 1) indicates the samples from BV that did not respond to  
837 metronidazole treatment later; “NR2” (No Response 2) indicates the samples after treatment  
838 with no response to the treatment. “WR1” (With Response 1) represents the samples with  
839 acute BV which afterwards responded to metronidazole.

840

- 841 **Supplementary Table S1: All supplementary data**
- 842 **Sheet 1. Sample description**
- 843 **Sheet 2. Read summary**
- 844 **Sheet 3. Genomes in the refined Kraken reference genome database**
- 845 **Sheet 4. Customized reference gene database for BWA**
- 846 **Sheet 5. Species composition determined by Kraken based on refined database**
- 847 **Sheet 6. The comparison of the community composition identified by 16S and**  
848 **metatranscriptome (average relative abundance  $\geq 2\%$ )**
- 849 **Sheet 7. The gene expression based on customized reference gene database with KO**  
850 **annotation**
- 851 **Sheet 8. Differential expression of KO between BV and health**
- 852 **Sheet 9. KEGG pathway enriched in up-regulated KO genes in BV**
- 853 **Sheet 10. The differential expression of KO genes between *L. crispatus* and *L. iners***
- 854 **Sheet 11. KEGG pathway enriched in up-regulated KO genes in *L. crispatus***
- 855 **Sheet 12. Expression of metronidazole associated genes in *G. vaginalis***
- 856 **Sheet 13. Expression of metronidazole associated genes in *A. vaginae***
- 857 **Sheet 14. The differential expression of KO genes between community without response**  
858 **to metronidazole treatment and with response**

859 **Sheet 15. The differential expression of KO genes of *G. vaginalis* from community**

860 **without response to metronidazole treatment and with response**

861 **Sheet 16. The differential expression of KO genes of *G. vaginalis* from community after**

862 **treatment without response to metronidazole and before the treatment with response**

with response to treatment

no response to treatment

cured

recurrence

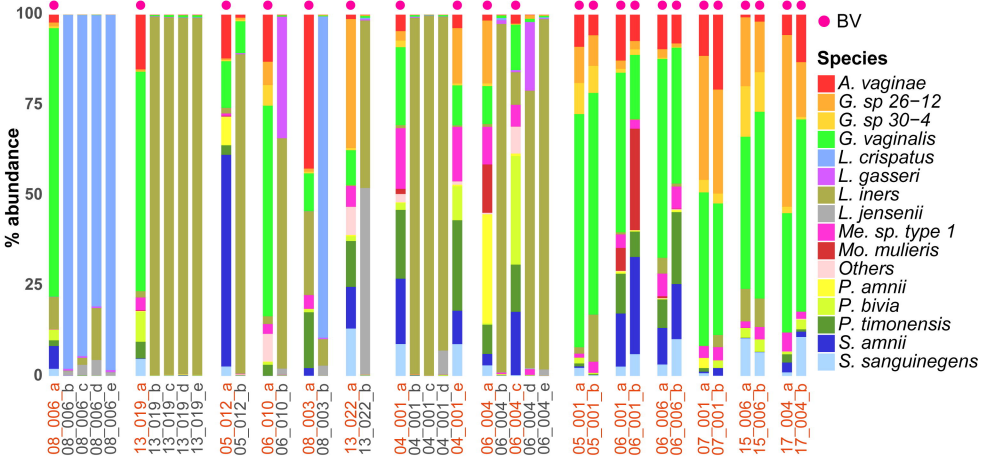





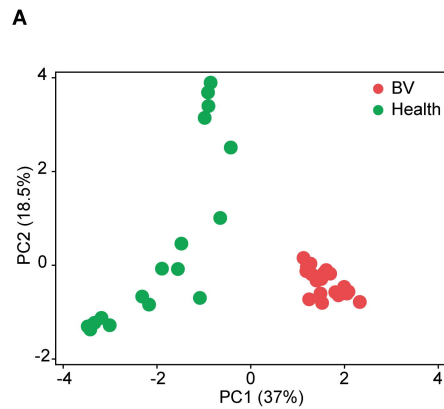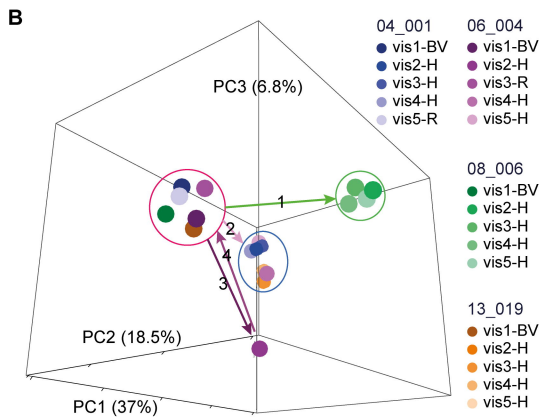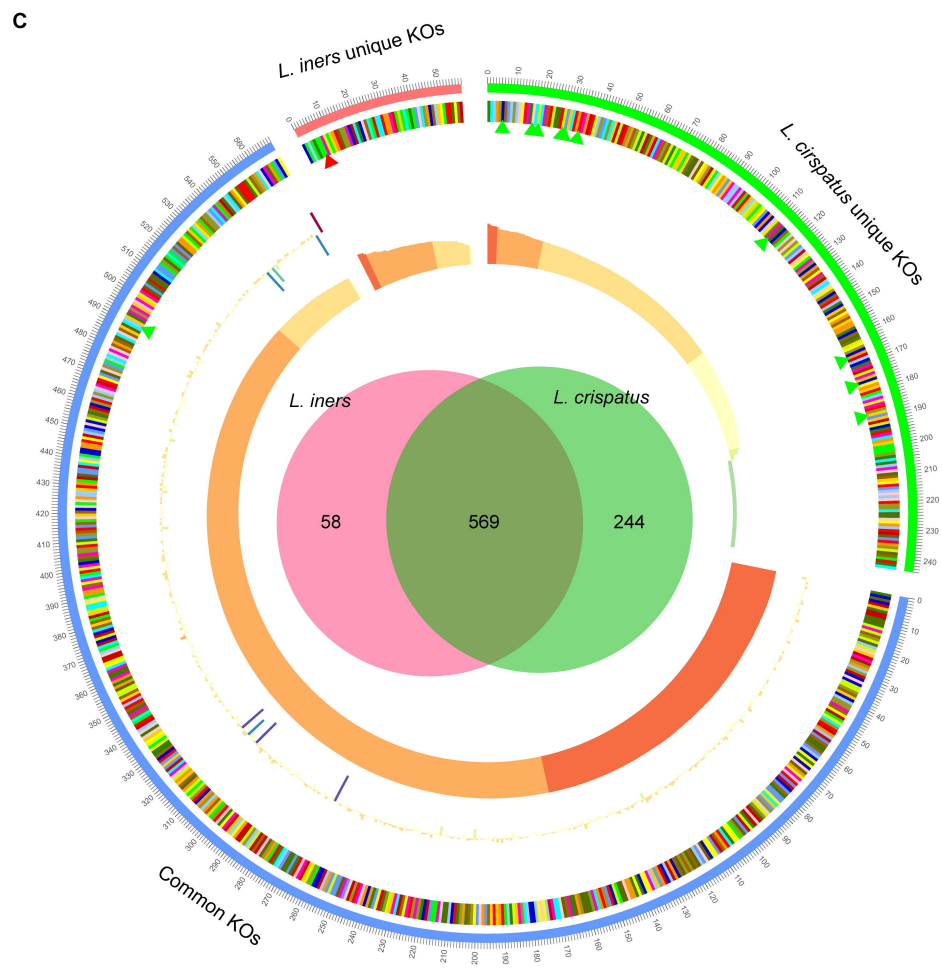

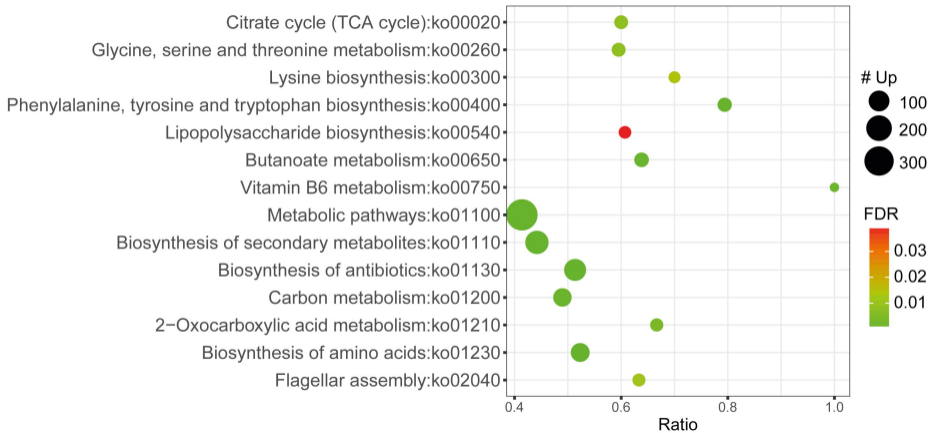

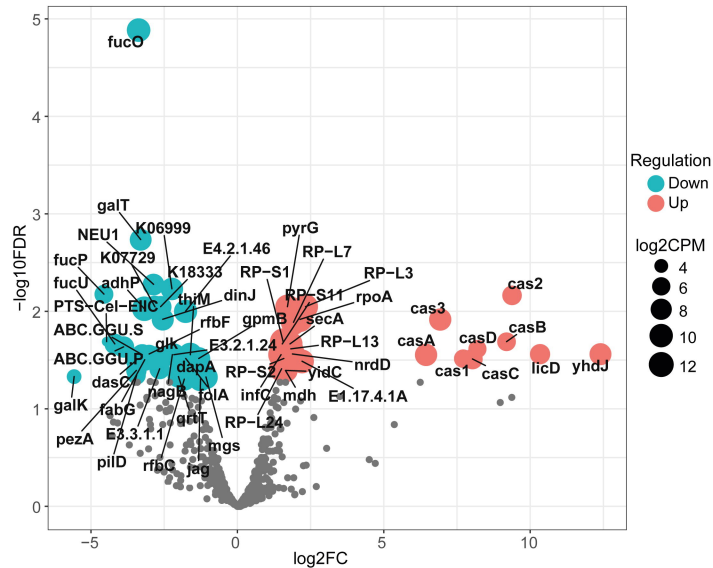

Source: http://biorxiv.org/content/10.1101/248302v1.full.pdf
